# Supplementary material for: Furin sustains tumor-promoting signals in KRAS- and BRAF-mutated colorectal cancer by engaging the TGF-β1–COX-2 axis in a reciprocal regulatory network
Source: Research Square preprint supplement (doi:10.21203/rs.3.rs-7633807/v1), 2025-10-27
Supplement: Supplementary file 1 [file 6873061365648de67380f485.pdf]

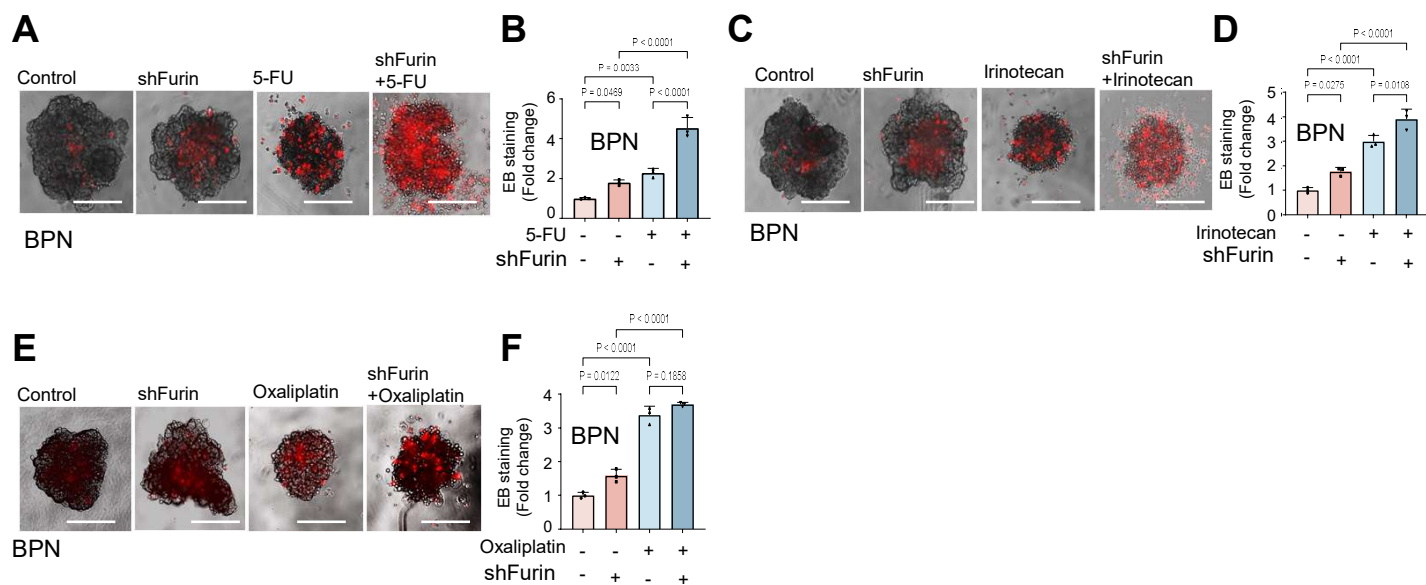

**Supplementary Fig. S1.** (A, C, E) Representative images of BPN organoids (control and shFurin-expressing) treated with **5-fluorouracil (5-FU, 500  $\mu$ M)** (A), **irinotecan (10  $\mu$ M)** (C), or **oxaliplatin (10  $\mu$ M)** (E). Cytotoxicity was assessed using ethidium bromide (EB) staining. Images are representative of 6 organoids per condition from 3 independent experiments. (B, D, F) Quantification of EB staining intensity corresponding to treatments shown in A, C, and E, respectively, expressed as percentage of staining. Scale bars: 500  $\mu$ m. Data are shown as mean  $\pm$  SD from three independent experiments. Statistical analysis was performed using one-way ANOVA followed by Tukey's multiple comparison test.

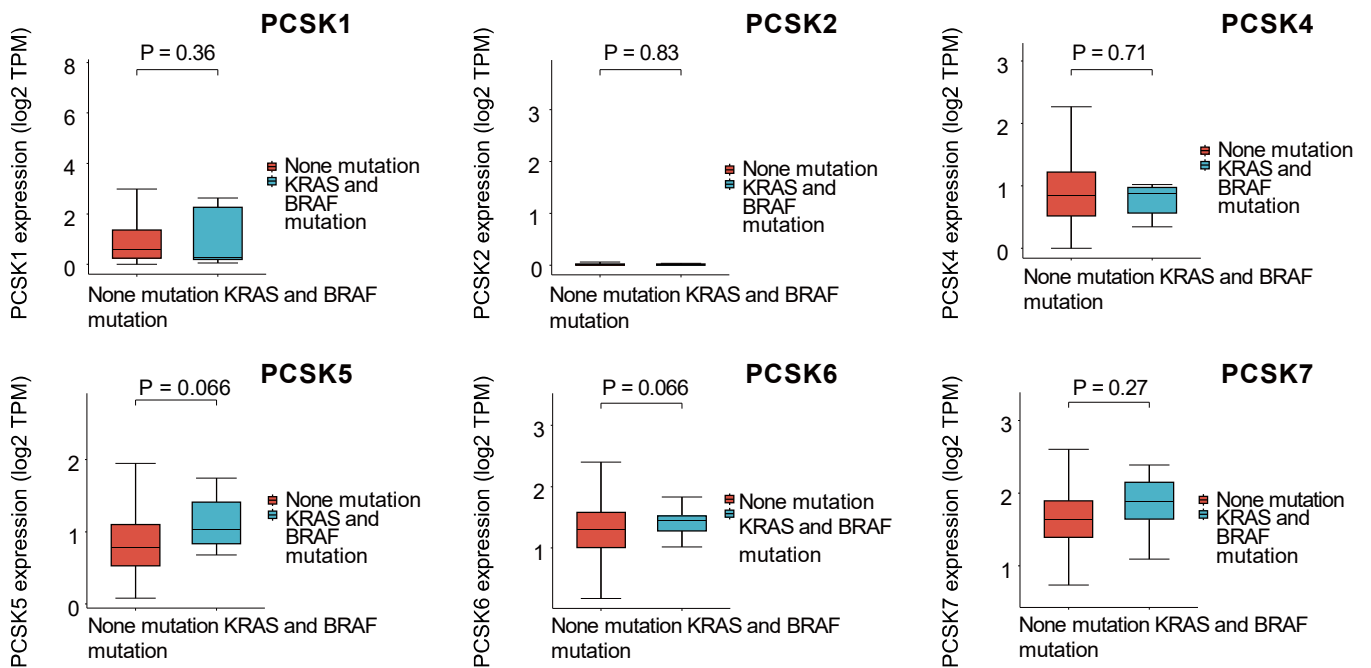

**Supplementary Fig. S2. :** Expression levels of indicated PCs in COAD and READ mutated tissues (n = 17) and non-mutated tissues (n = 328) were obtained from the TCGA dataset. The central band, boxes, and whiskers of the box plot represent the median, first quartile, third quartile, minimum, and maximum values. COAD: Colon adenocarcinoma, READ : Rectum adenocarcinoma

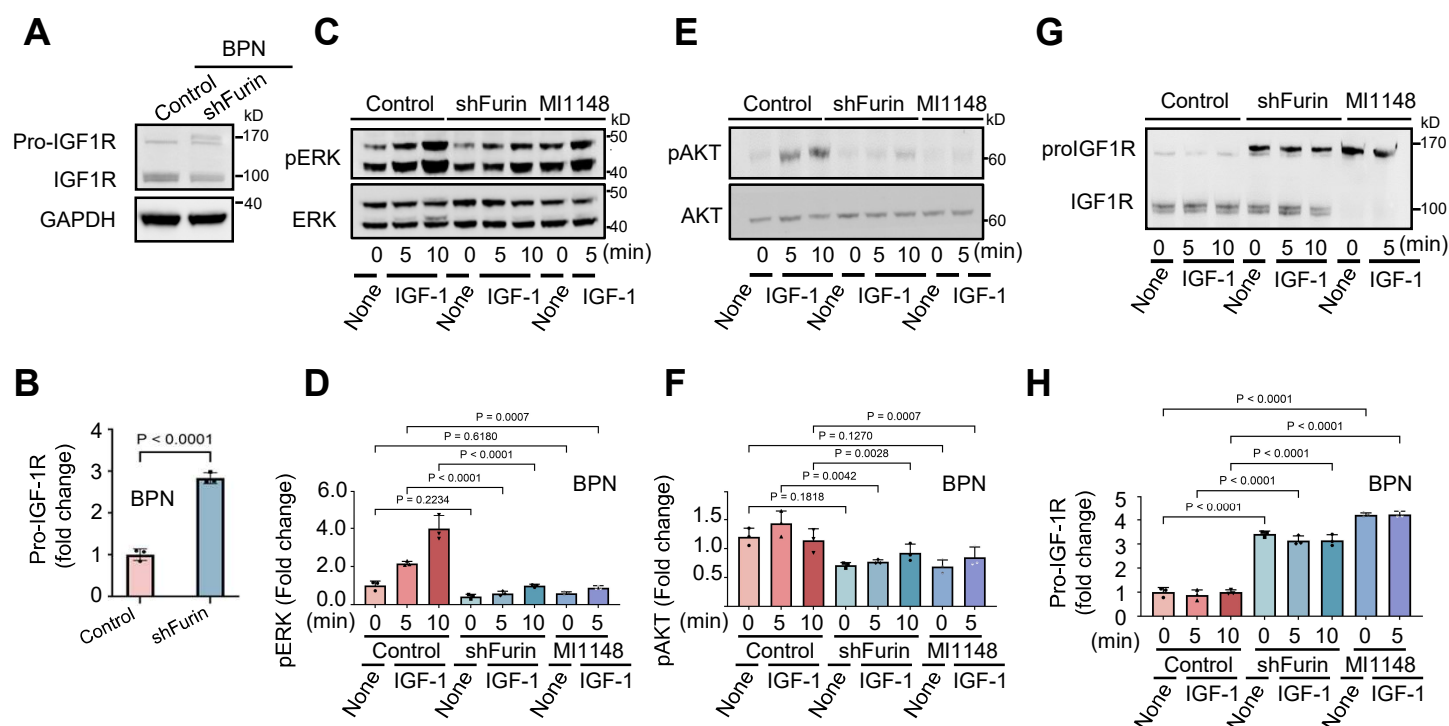

**Supplementary Fig. S3.** (A) Western blot analysis showing both the precursor form of IGF-1R (Pro-IGF-1R) and the mature, processed form (IGF-1R $\beta$ ) in BRAF-mutant control cells (BPN) and in BPN cells with stable shFurin expression. (B) Quantification of Pro-IGF-1R accumulation, calculated as the ratio of Pro-IGF-1R to total IGF-1R (Pro-IGF-1R / [Pro-IGF-1R + IGF-1R]), expressed as a percentage. (C-F) Immunoblot analysis of phosphorylated and total ERK1/2 (C, D) and AKT (E, F) in control BPN cells and in BPN cells stably expressing shFurin, following IGF-1 stimulation (100 ng/mL) at the indicated time points. Quantification of phosphorylated proteins (D, F) was normalized to total protein levels. (G) Western blot analysis of Pro-IGF-1R accumulation in both control BPN and shFurin-expressing BPN cells. (H) Quantification of mature IGF-1R levels, calculated as the ratio of IGF-1R to total IGF-1R (IGF-1R / [Pro-IGF-1R + IGF-1R]), shown as a percentage of total receptor. All data are derived from three independent experiments ( $n = 3$  per experiment) and presented as mean  $\pm$  SD. Statistical analysis was performed using one-way ANOVA followed by Tukey's multiple comparison test for panels D, F, and H, and an unpaired two-tailed t-test for panel B.

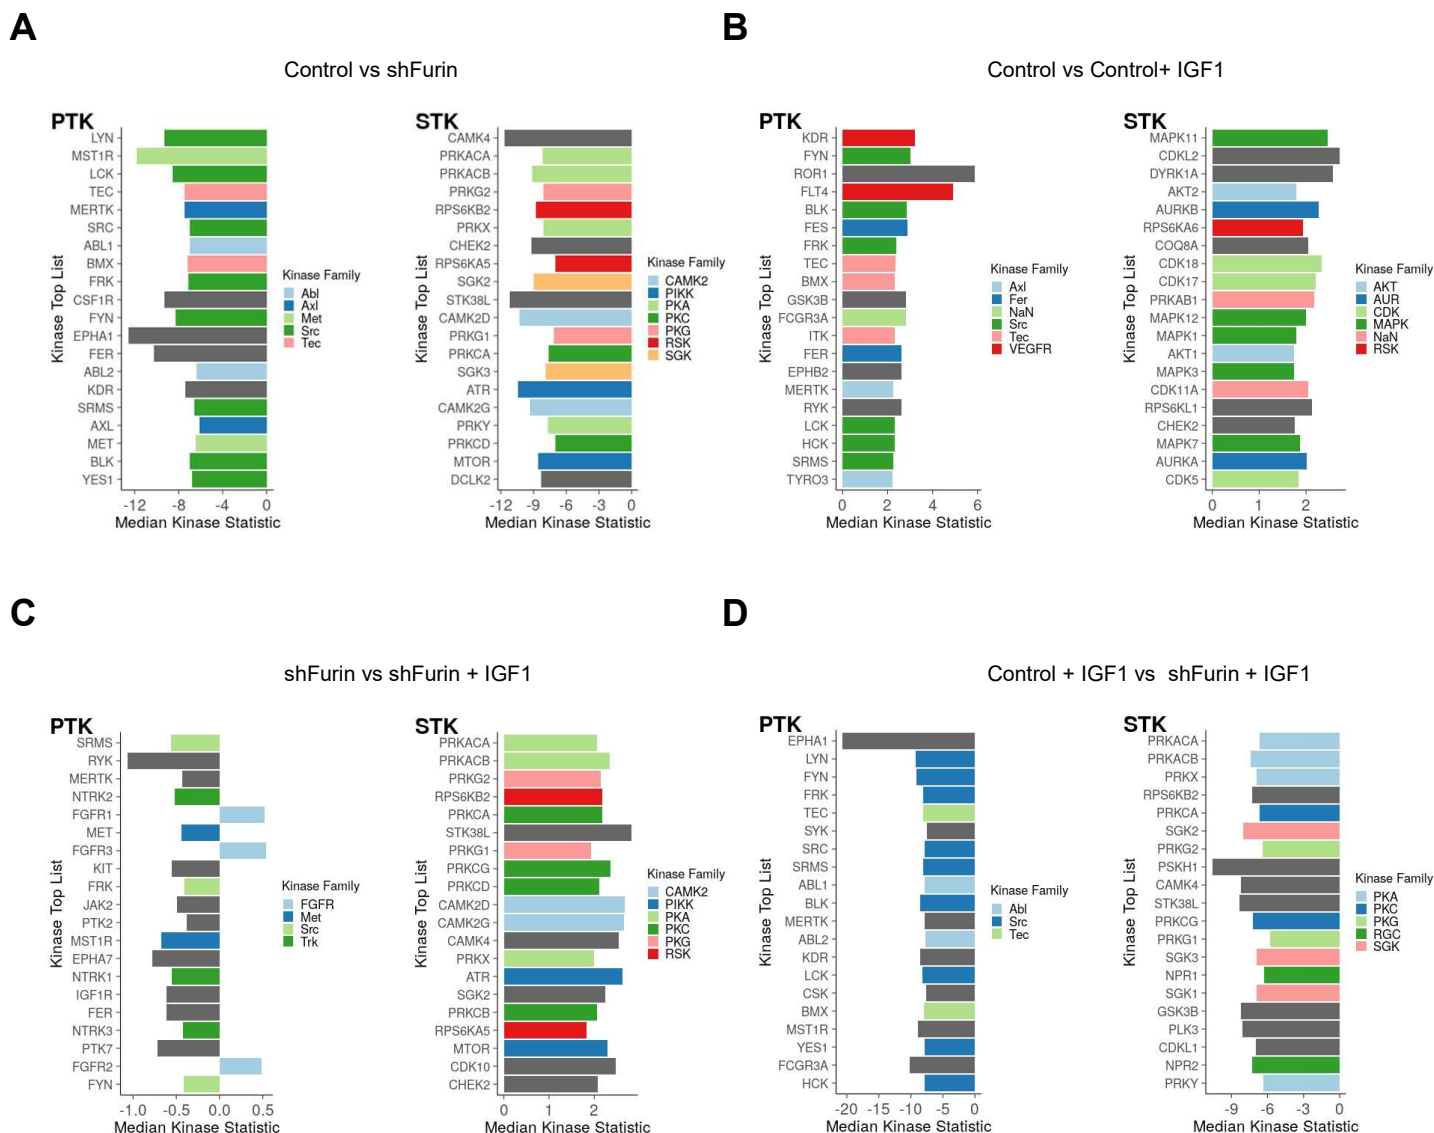

**Supplementary Fig. S4:** Upstream kinase analysis of PTK and STK of Control vs shFurin (A), Control vs Control+ IGF1, (B), shFurin vs shFurin + IGF1 (C), shFurin vs shFurin + IGF1, showing the top 20 ranked kinases (normalized kinase statistic ( $\log_2$ )  $< 0$ : less kinase activity in treated cells; specificity score ( $\log_2$ )  $> 1.3$ ; white to red bars: statistically significant changes).

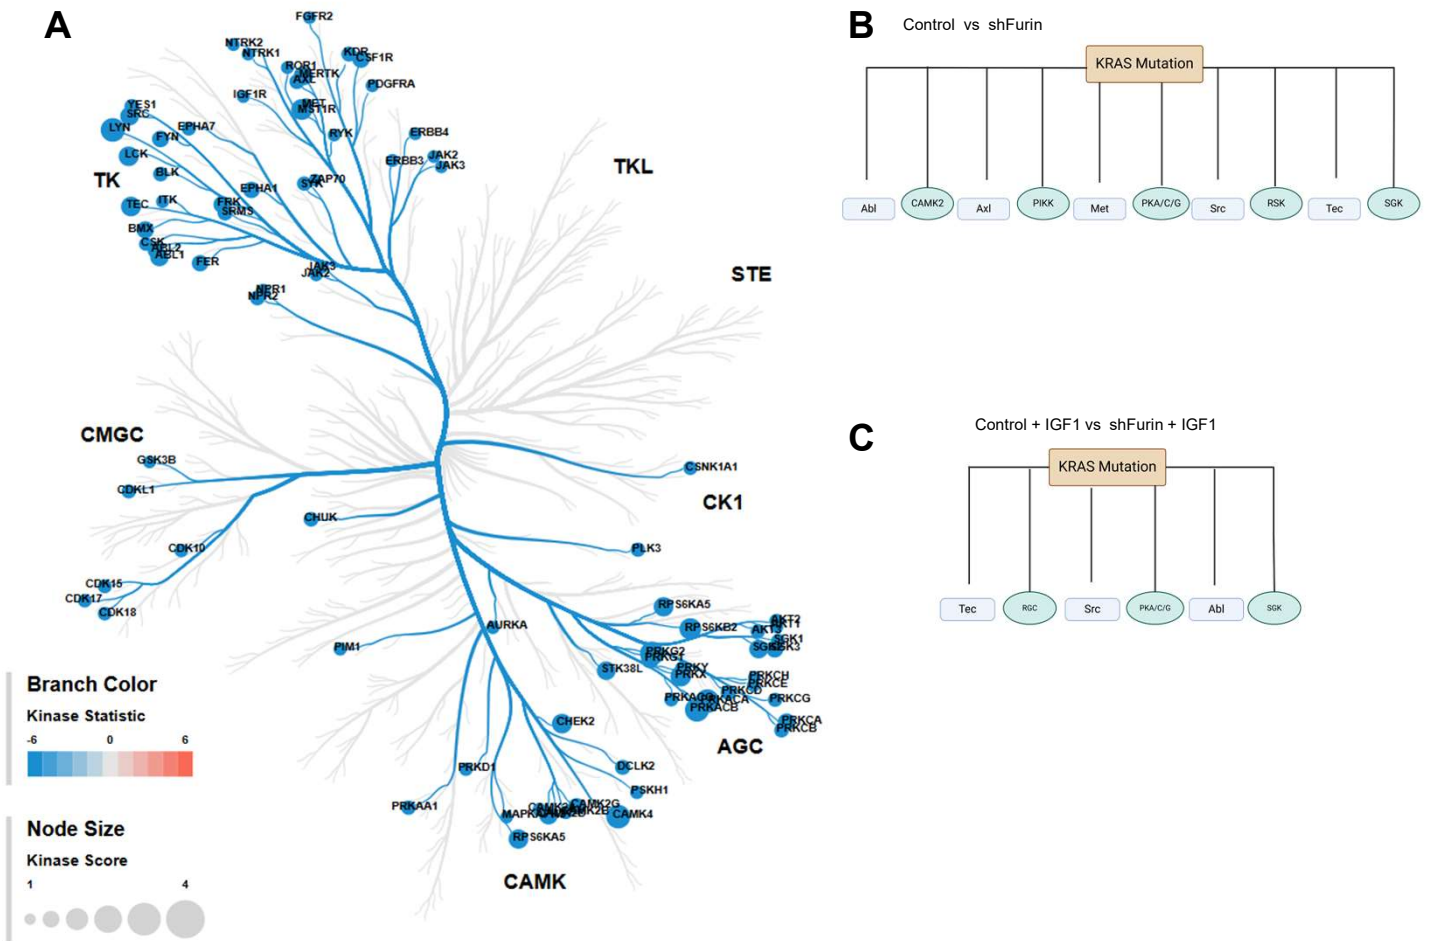

**Supplementary Fig. S5 :** (A) Kinome tree depicting kinases in control and shFurin-expressing cells, grouped into phylogenetic families. Only kinases with a Kinase Score > 1.3 (above default threshold) are shown. Kinome trees were generated using the CORAL tool (<http://phanstiel-lab.med.unc.edu/CORAL/>). (B) Protein tyrosine kinases (PTKs, blue) and serine/threonine kinases (STKs, green) were downregulated in shFurin-expressing cells. (C) Similar downregulation of PTKs (blue) and STKs (green) was observed in shFurin-expressing cells following IGF-1 stimulation.

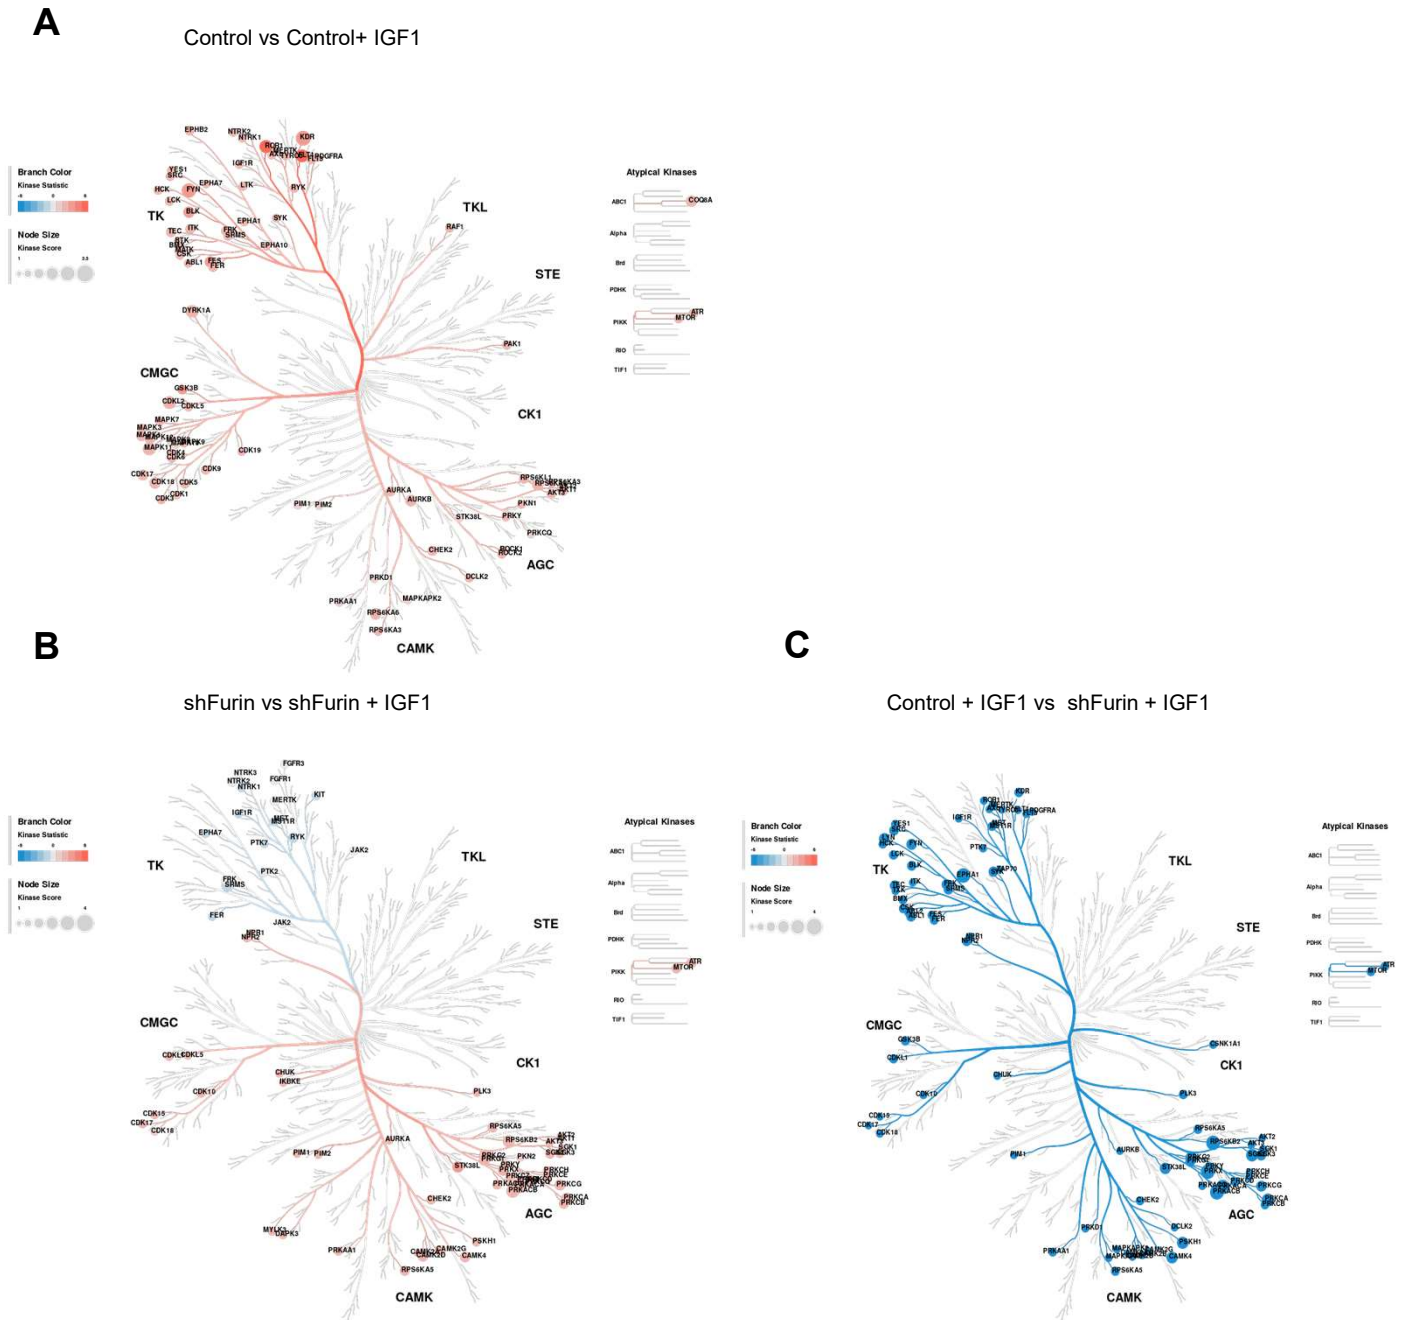

**Supplementary Fig. S6 :** Kinome Tree, grouping the kinases in Control vs Control+ IGF1 (**A**), shFurin vs shFurin + IGF1 (**B**), shFurin vs shFurin + IGF1 (**C**), into phylogenetic families. The Coral Trees display all kinases above the default threshold (Kinase Score > 1.3). The Coral Trees were generated using <http://phanstiel-lab.med.unc.edu/CORAL/>.



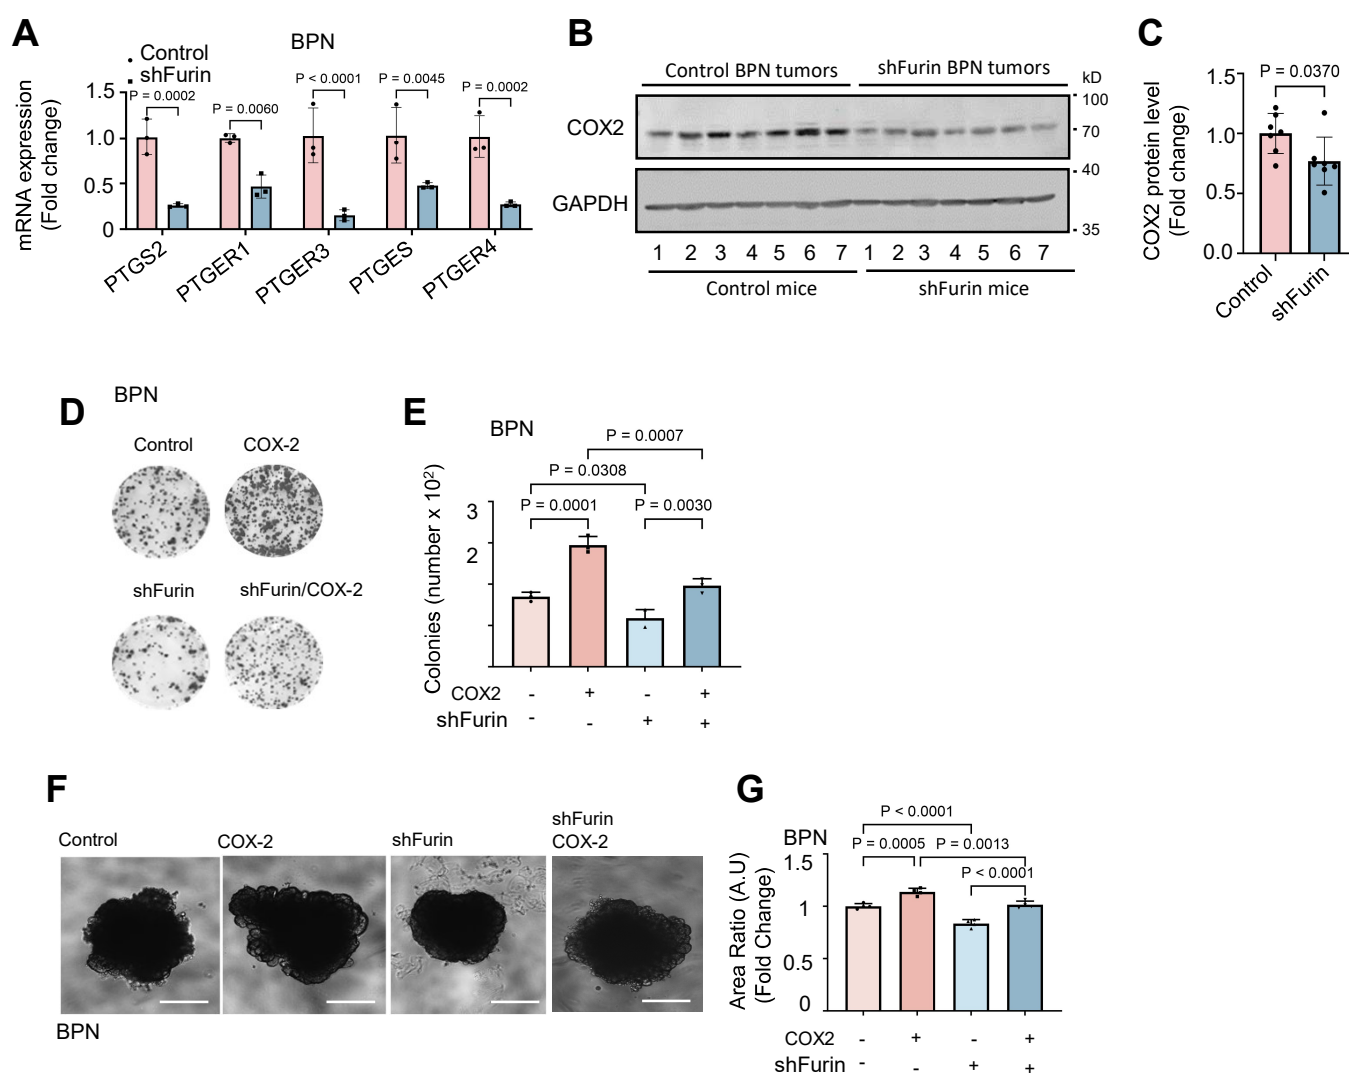

**Supplementary Fig. S7, (A)** Relative mRNA expression levels of PTGS2, PTGER1, PTGER3, PTGER4, and PTGES in control BPN cells and in BPN cells stably expressing shFurin, measured by qRT-PCR and normalized to *GAPDH* (n = 3 independent experiments). **(B)** Western blot analysis of COX2 protein levels in tumors derived from control BPN cells and from shFurin-expressing BPN cells-injected mice (n = 7). **(C)** Quantification of COX2 protein expression in tumors from mice injected with control and shFurin-expressing cells, based on the data shown in (B). **(D, E)** Representative images **(D)** and quantification **(E)** of colony formation by control BPN cells and shFurin-expressing cells, stained with crystal violet (n = 3 independent experiments). **(F)** Representative images of organoid morphology in control and shFurin-expressing BPN cells after 5 days of culture (n = 3–6 organoids per condition from 3 independent experiments). **(G)** Quantification of organoid area after 5 days of culture. Scale bars: 500  $\mu$ m. All data represent mean  $\pm$  SD from three independent experiments. Statistical significance was assessed by one-way ANOVA with Tukey's multiple comparison test for (A), (E), and (G), and by two-tailed unpaired *t*-test for (C).

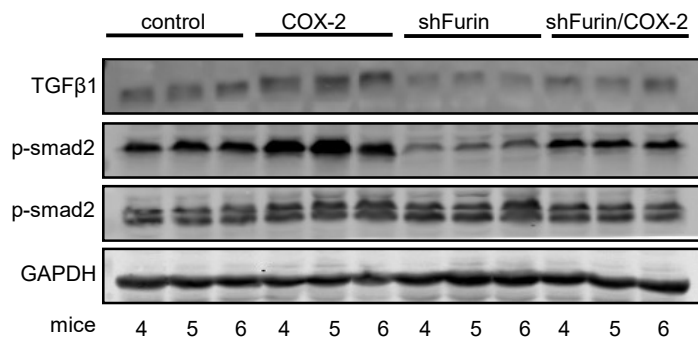

**Supplementary Fig. S8:**(a)Western blot analysis of TGF-β1, p-Smad2, Smad2, and GAPDH expression in tumors derived from mice injected with control KPN cells, or KPN cells expressing COX2, shFurin, or co-expressing shFurin and COX2.
